# Supplementary material for: Activation of Peracetic Acid by CoFe2O4 for Efficient Degradation of Ofloxacin: Reactive Species and Mechanism
Source: MDPI journal article supplement (doi:10.3390/molecules28237906), 2023-12-02
Supplement: s1 [file s1]

## **Supplementary Material**

### **Activation of Peracetic Acid by CoFe<sub>2</sub>O<sub>4</sub> for Efficient Degradation of Ofloxacin: Reactive Species and Mechanism**

Rong Li, Xing Lu, Jinxiang Gao, Yifan Chen, Shunlong Pan \*

School of Environmental Science and Engineering, Nanjing Tech University, Nanjing  
211816, China; 202161202058@njtech.edu.cn (R.L.); 202161102009@njtech.edu.cn  
(X.L.); 202261202027@njtech.edu.cn (J.G.); 202261202055@njtech.edu.cn (Y.C.)

\* Correspondence: shunlongpan@njtech.edu.cn

**Test S1.** Pseudo-first-order kinetic equation.

**Table S1.** An overview of research on the removal of OFX by ferrites.

**Table S2.** Quality of tap water and surface water.

**Table S3.** Change of valence state of elements in  $\text{CoFe}_2\text{O}_4$  before and after reaction by XPS analysis.

**Table S4.** Intermediates of OFX degradation in  $\text{CoFe}_2\text{O}_4/\text{PAA}$  system.

**Table S5.** CAS Registry Number of chemicals.

**Table S6.** Details of the detection conditions in HPLC for organic compounds.

**Table S6.** CAS Registry Number of chemicals.

**Figure S1.** Decomposition of PAA during the reaction.

**Figure S2.** The zeta potential of  $\text{CoFe}_2\text{O}_4$ .

**Figure S3.** Degradation of NAP and *p*CBA in  $\text{CoFe}_2\text{O}_4/\text{PAA}$  system.

**Figure S4.** Effects of quenchers on the decomposition of PAA.

**Figure S5.** Degradation of PMSO and production of  $\text{PMSO}_2$  in  $\text{CoFe}_2\text{O}_4/\text{PAA}$  system.

**Figure S6.** Effect of PMSO on the degradation of OFX.

**Figure S7.** LC-TOF-MS chromatograms of OFX and the intermediates in  $\text{CoFe}_2\text{O}_4/\text{PAA}$  system.

**Test S1.** Pseudo-first-order kinetic equation

The apparent rate constant ( $k_{obs}$ ) was calculated by fitting the degradation kinetics of OFX with a pseudo-first-order model:

$$-\ln\left(\frac{C_t}{C_0}\right) = k_{obs} t \quad (S1)$$

Where,  $C_0$  and  $C_t$  represent the concentration of OFX at the initial and a certain reaction time respectively, and  $t$  represents the reaction time.

**Table S1.** An overview of research on the removal of OFX by ferrites.

| Catalyst                                                                                                  | OFX     | Operation conditions                                                                   | Removal Efficiency | Ref |
|-----------------------------------------------------------------------------------------------------------|---------|----------------------------------------------------------------------------------------|--------------------|-----|
| Ag <sub>3</sub> PO <sub>4</sub> /CoFe <sub>2</sub> O <sub>4</sub><br>(0.5 g/L)                            | 20 mg/L | under visible light;<br>150 min                                                        | 95.9%              | [1] |
| MSm <sub>x</sub> Fe <sub>2-x</sub> O <sub>4</sub><br>(M = Ni, Co; x = 0,<br>0.02, 0.06, 0.1)<br>(0.5 g/L) | 15 mg/L | [H <sub>2</sub> O <sub>2</sub> ] = 9.8 mM;<br>pH = 2.5; 60 min;<br>under visible light | 57%-86%            | [2] |
| CuFe <sub>2</sub> O <sub>4</sub> -Mt<br>(0.4 g/L)                                                         | 40 mg/L | [PMS] = 2.0 mM;<br>pH = 6.8; 60 min                                                    | 85.2%              | [3] |
| CoFe <sub>2</sub> O <sub>4</sub> @Bi <sub>2</sub> O <sub>3</sub> /NiO<br>(0.3 g/L)                        | 10 mg/L | under visible light;<br>90 min                                                         | 95.2%              | [4] |
| Cellulose/PANI/NiFe <sub>2</sub> O <sub>4</sub><br>(0.5 g/L)                                              | 0.05 mM | [H <sub>2</sub> O <sub>2</sub> ] = 8.8 uM;<br>pH = 2.5; 30 min<br>under visible light  | 87.44%             | [5] |
| CoFe <sub>2</sub> O <sub>4</sub> /WS<br>(1.0 g/L)                                                         | 20 mg/L | [PMS] = 1.0 g/L;<br>30 min                                                             | 92.8%              | [6] |
| MnFe <sub>2</sub> O <sub>4</sub> @C-NH <sub>2</sub><br>(1.0 g/L)                                          | 30 mg/L | [H <sub>2</sub> O <sub>2</sub> ] = 29.4 mM;<br>pH = 3; 180 min                         | 97.4%              | [7] |

**Table S2.** Quality of tap water and surface water.

| <b>Category</b> | <b>TOC<br/>(mg/L)</b> | <b>COD<br/>(mg/L)</b> | <b>TN<br/>(mg/L)</b> |
|-----------------|-----------------------|-----------------------|----------------------|
| Tap water       | 0.79                  | 2.31                  | 1.56                 |
| Surface water   | 12.59                 | 39.03                 | 2.31                 |

**Table S3.** Change of valence state of elements in CoFe<sub>2</sub>O<sub>4</sub> before and after reaction by XPS analysis.

| Elements |                  | Before  | After  |
|----------|------------------|---------|--------|
| Co       | Co(II)           | 46.58%  | 50.44% |
|          | Co(III)          | 53.42%  | 49.56% |
| Fe       | Fe(II)           | 58.68 % | 55.88% |
|          | Fe(III)          | 41.32%  | 44.12% |
| O        | Lattice O        | 75.75%  | 70.83% |
|          | Surface OH       | 19.50%  | 21.39% |
|          | H <sub>2</sub> O | 4.75%   | 7.78%  |

**Table S4.** Intermediates of OFX degradation in CoFe<sub>2</sub>O<sub>4</sub>/PAA system.

| Product ID | Molecular weight<br>[M + H <sup>+</sup> ] | Molecular<br>formula                                            | Proposed<br>structure |
|------------|-------------------------------------------|-----------------------------------------------------------------|-----------------------|
| OFX        | 362                                       | C <sub>18</sub> H <sub>20</sub> O <sub>4</sub> N <sub>3</sub> F |                       |
| P1         | 354                                       | C <sub>16</sub> H <sub>20</sub> O <sub>5</sub> N <sub>3</sub> F |                       |
| P2         | 314                                       | C <sub>14</sub> H <sub>20</sub> O <sub>4</sub> N <sub>3</sub> F |                       |
| P3         | 283                                       | C <sub>13</sub> H <sub>18</sub> O <sub>3</sub> N <sub>3</sub> F |                       |
| P4         | 334                                       | C <sub>17</sub> H <sub>20</sub> O <sub>3</sub> N <sub>3</sub> F |                       |
| P5         | 205                                       | C <sub>11</sub> H <sub>9</sub> ON <sub>2</sub> F                |                       |
| P6         | 194                                       | C <sub>10</sub> H <sub>11</sub> ON <sub>2</sub> F               |                       |
| P7         | 280                                       | C <sub>13</sub> H <sub>13</sub> O <sub>4</sub> N <sub>2</sub> F |                       |
| P8         | 224                                       | C <sub>11</sub> H <sub>10</sub> O <sub>3</sub> NF               |                       |
| P9         | 344                                       | C <sub>18</sub> H <sub>21</sub> O <sub>4</sub> N <sub>3</sub>   |                       |

|     |     |                      |                                                                                     |
|-----|-----|----------------------|-------------------------------------------------------------------------------------|
| P10 | 327 | $C_{17}H_{17}O_4N_3$ | 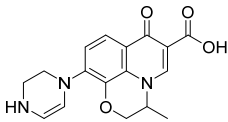 |
| P11 | 300 | $C_{17}H_{21}O_2N_3$ |  |
| P12 | 149 | $C_8H_7O_2N$         |  |



**Table S5.** CAS Registry Number of chemicals.

| Chemicals         | CAS        | Chemicals          | CAS        |
|-------------------|------------|--------------------|------------|
| OFX               | 82419-36-1 | DPD                | 93-05-0    |
| NOR               | 70458-96-7 | HA                 | 1415-93-6  |
| CIP               | 85721-33-1 | <i>p</i> CBA       | 74-11-3    |
| ENR               | 93106-60-6 | NAP                | 22204-53-1 |
| TBA               | 75-65-0    | PMSO               | 1193-82-4  |
| MeOH              | 67-56-1    | PMSO <sub>2</sub>  | 3112-85-4  |
| CHCl <sub>3</sub> | 67-66-3    | CH <sub>3</sub> CN | 75-05-8    |
| FFA               | 98-00-0    | HCOOH              | 64-18-6    |

**Table S6.** Details of the detection conditions in HPLC for organic compounds.

| Chemicals                                       | Flow rate<br>(mL/min) | Mobile phase                              | Wavelength<br>(nm) |
|-------------------------------------------------|-----------------------|-------------------------------------------|--------------------|
| Ofloxacin<br>(OFX)                              | 1.0                   | Acetonitrile: 0.1% formic acid<br>(15:85) | 288                |
| Norfloxacin<br>(NOR)                            | 1.0                   | Acetonitrile: 0.1% formic acid<br>(30:70) | 275                |
| Ciprofloxacin<br>(CIP)                          | 1.0                   | Acetonitrile: 0.1% formic acid<br>(30:70) | 275                |
| Enrofloxacin<br>(ENR)                           | 1.0                   | Acetonitrile: 0.1% formic acid<br>(20:80) | 278                |
| <i>p</i> -chlorobenzoic acid<br>( <i>p</i> CBA) | 1.0                   | Acetonitrile: 0.1% formic acid<br>(40:60) | 236                |
| Naproxen<br>(NAP)                               | 1.0                   | Acetonitrile: 0.1% formic acid<br>(60:40) | 231                |
| Methyl phenyl sulfoxide<br>(PMSO)               | 1.0                   | Acetonitrile: 0.1% formic acid<br>(25:75) | 230                |
| Methyl phenyl sulfone<br>(PMSO <sub>2</sub> )   | 1.0                   | Acetonitrile: 0.1% formic acid<br>(25:75) | 215                |

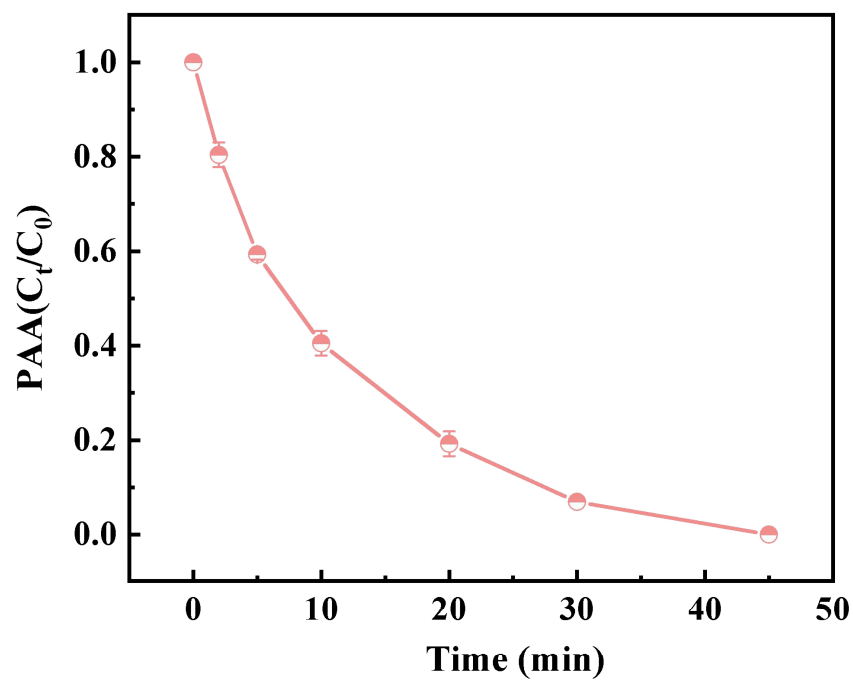

**Figure S1.** Decomposition of PAA during the reaction. Experimental conditions:  $[\text{OFX}] = 20 \mu\text{M}$ ,  $[\text{PAA}]_0 = 0.4 \text{ mM}$ ,  $\text{CoFe}_2\text{O}_4 = 0.10 \text{ g/L}$ ,  $\text{pH} = 7.0$ ,  $T = 25 \text{ }^\circ\text{C}$ .

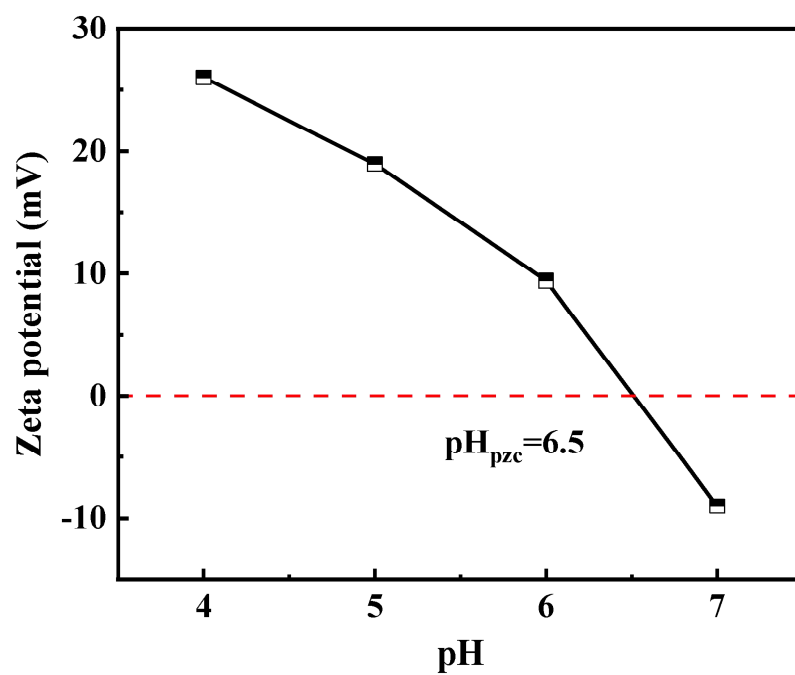

**Figure S2.** The zeta potential of  $\text{CoFe}_2\text{O}_4$ .

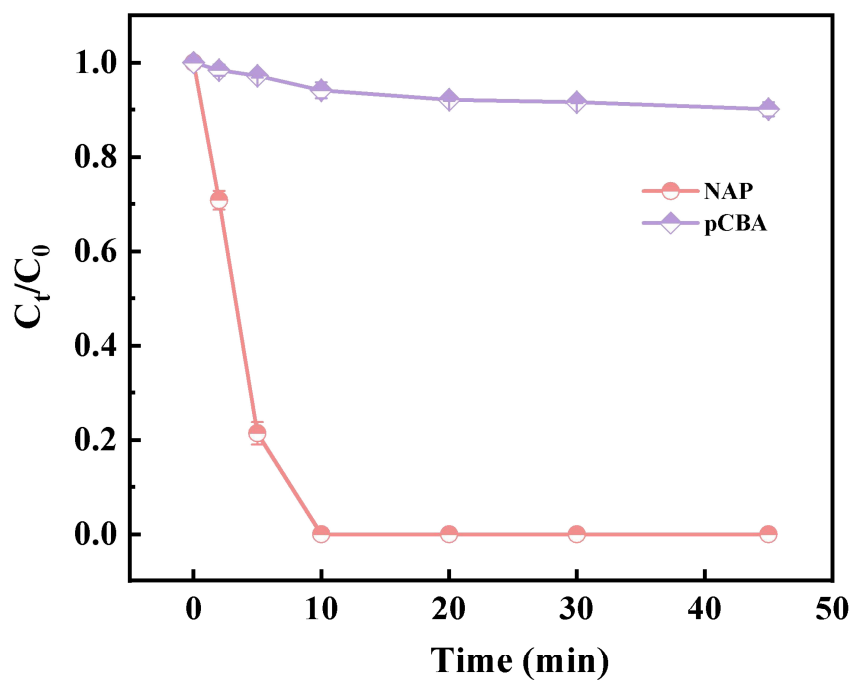

**Figure S3.** Degradation of NAP and pCBA in CoFe<sub>2</sub>O<sub>4</sub>/PAA system. Experimental conditions: [NAP] = [pCBA] = 20  $\mu$ M, [PAA]<sub>0</sub> = 0.4 mM, CoFe<sub>2</sub>O<sub>4</sub> = 0.10 g/L, pH = 7.0, T = 25  $^{\circ}$ C.

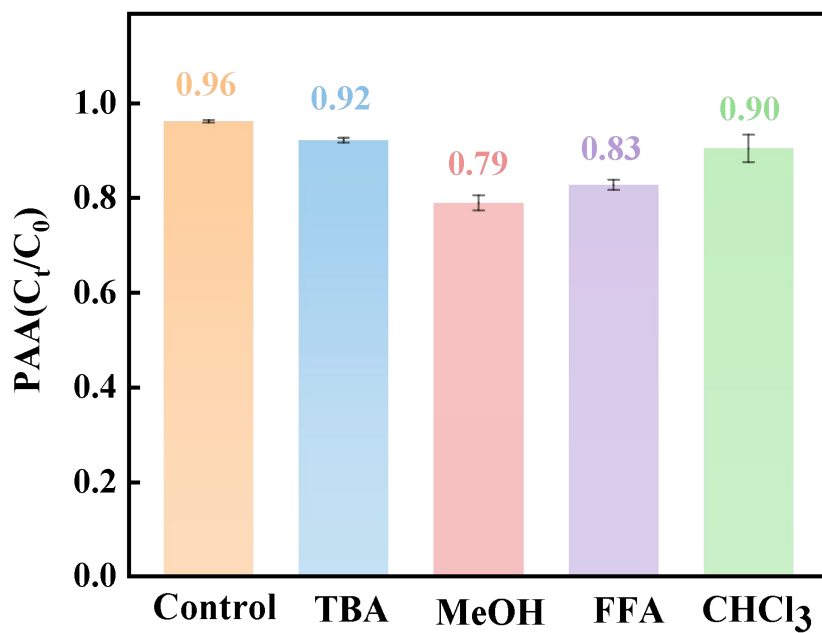

**Figure S4.** Effects of quenchers on the decomposition of PAA. Experimental conditions:  $[PAA]_0 = 0.4$  mM,  $[TBA] = [MeOH] = 100$  mM,  $[FFA] = [CHCl_3] = 10$  mM, pH = 7.0, T = 25 °C.

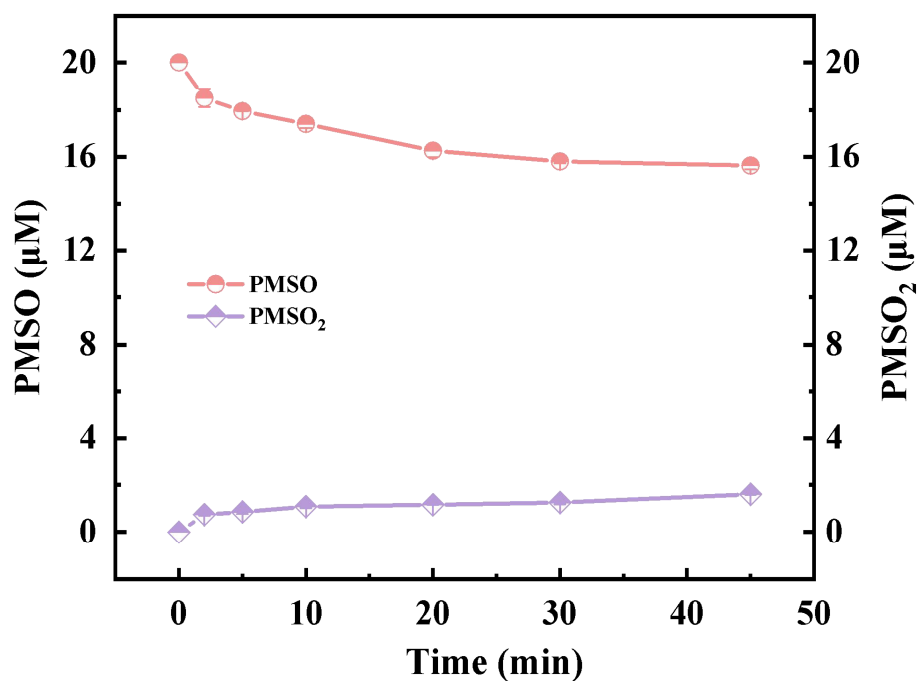

**Figure S5.** Degradation of PMSO and production of PMSO<sub>2</sub> in CoFe<sub>2</sub>O<sub>4</sub>/PAA system. Experimental conditions: [PMSO] = 20 μM, [PAA]<sub>0</sub> = 0.4 mM, CoFe<sub>2</sub>O<sub>4</sub> = 0.10 g/L, pH = 7.0, T = 25 °C.

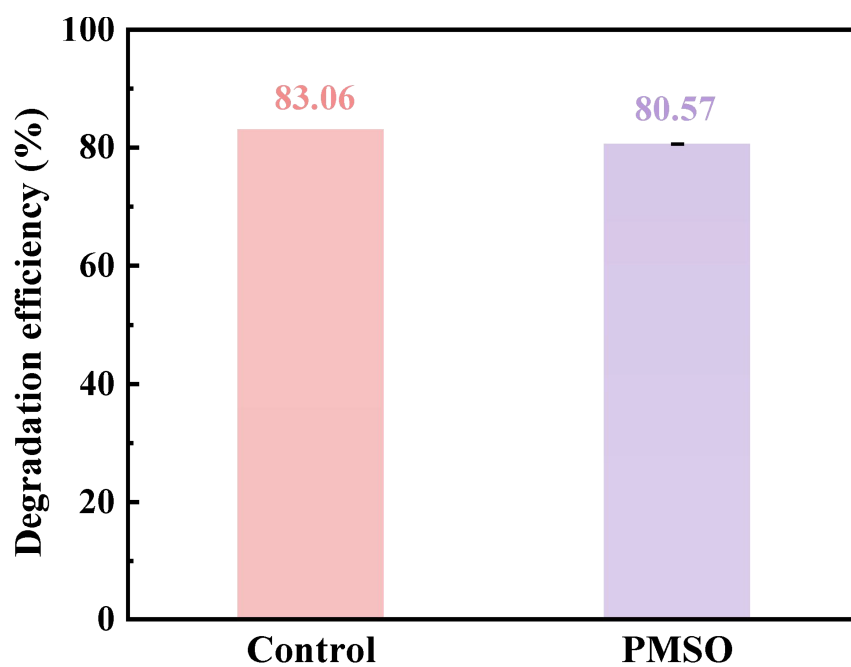

**Figure S6.** Effect of PMSO on the degradation of OFX. Experimental conditions: [OFX] = 20  $\mu$ M, [PMSO] = 100  $\mu$ M, [PAA]<sub>0</sub> = 0.4 mM, CoFe<sub>2</sub>O<sub>4</sub> = 0.10 g/L, pH = 7.0, T = 25 °C.



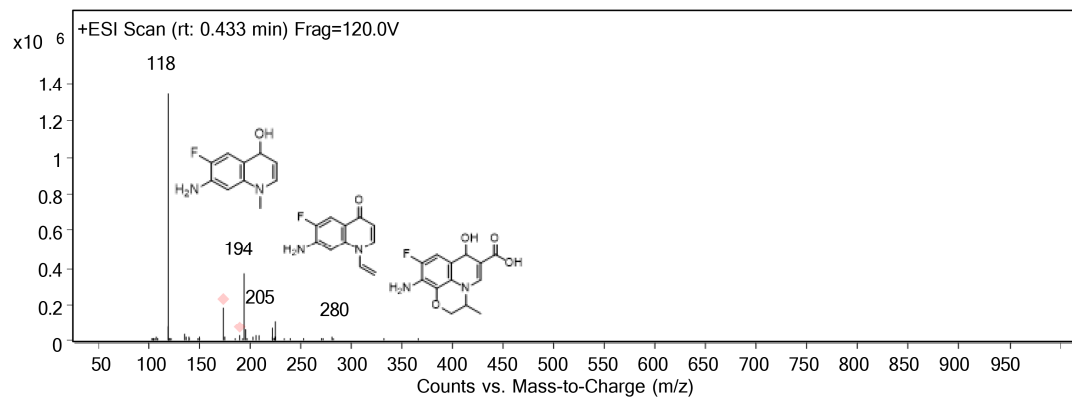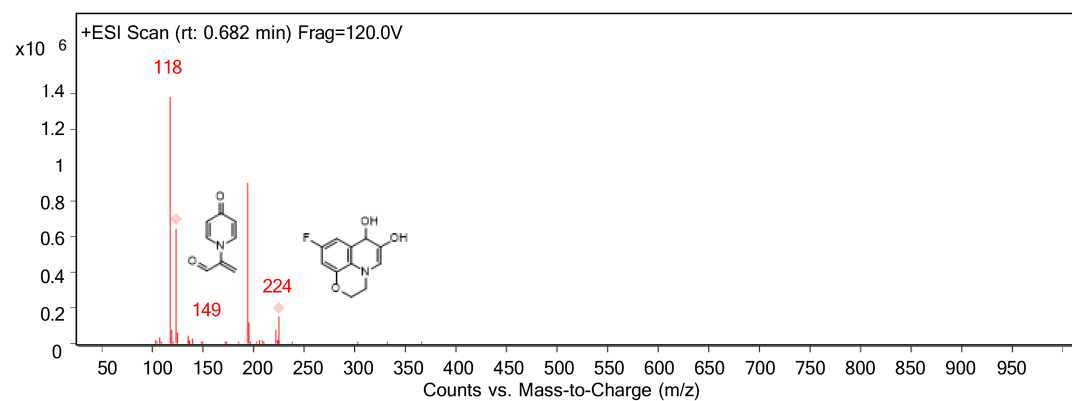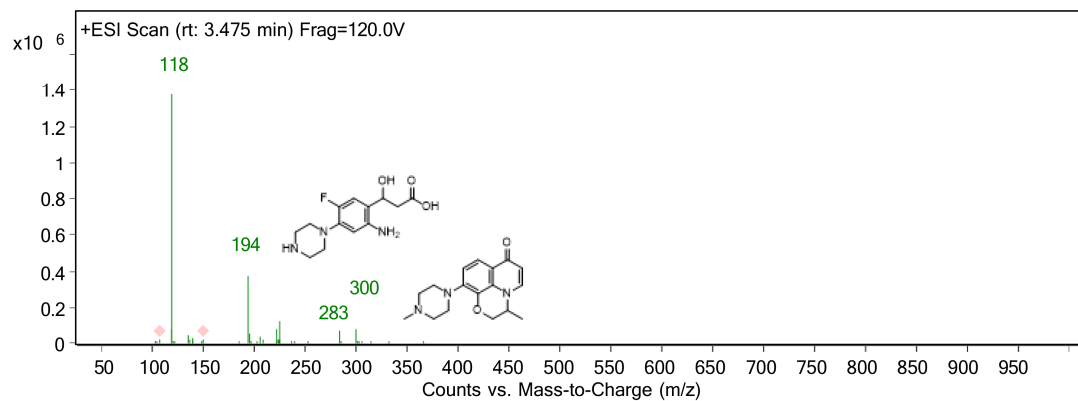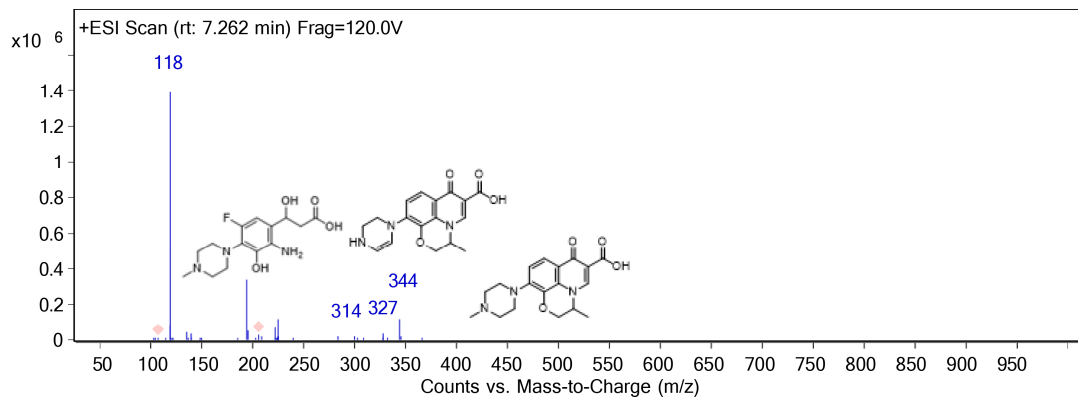

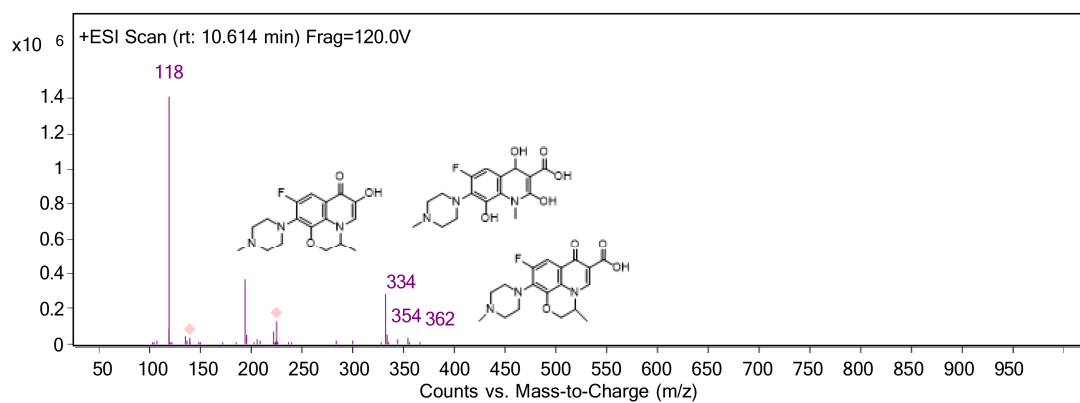

**Figure S7.** LC-TOF-MS chromatograms of OFX and the intermediates in CoFe<sub>2</sub>O<sub>4</sub>/PAA system.

## References

1. Ye, H.; Xia, L.; Wang, Y.; Zhou, H.; Xie, X.; Zuo, G.; Wu, K. Magnetic  $\text{Ag}_3\text{PO}_4/\text{CoFe}_2\text{O}_4$  Z-scheme heterojunction material for photocatalytic decomposition of ofloxacin. *J. Mater. Sci. Mater. Electron.* **2023**, *34*, 2090.
2. Singh, S.; Kaur, P.; Kumar, V.; Tikoo, K.B.; Singhal, S. Traversing the advantageous role of samarium doped spinel nanoferrites for photocatalytic removal of organic pollutants. *J. Rare Earths.* **2021**, *39*, 781-789.
3. Cao, X.Q.; Xiao, F.; Lyu, Z.W.; Xie, X.Y.; Zhang, Z.X.; Dong, X.; Wang, J.X.; Lyu, X.J.; Zhang, Y.Z.; Liang, Y.  $\text{CuFe}_2\text{O}_4$  supported on montmorillonite to activate peroxymonosulfate for efficient ofloxacin degradation. *J. Water Process. Eng.* **2021**, *44*, 102359.
4. Dhiman, P.; Sharma, G.; Alodhayb, A.N.; Kumar, A.; Rana, G.; Sithole, T.; Alothman, Z.A. Constructing a visible-active  $\text{CoFe}_2\text{O}_4@\text{Bi}_2\text{O}_3/\text{NiO}$  nanoheterojunction as magnetically recoverable photocatalyst with boosted ofloxacin degradation efficiency. *Molecules.* **2022**, *27*, 8234.
5. Nitansh; Kaur, P.; Garg, T.; Renu; Deepeka; Kumar, V.; Tikoo, K.; Kaushik, A.; Singhal, S. A fluorescent biomass derived cellulose/PANI/ $\text{NiFe}_2\text{O}_4$  composite for the mitigation of toxic pollutants and Cr(VI) sensing from aqueous environment. *J. Ind. Eng. Chem.* **2023**.
6. Zheng, C.; Wu, J.Y.; Zhang, Y.J.; Yang, Q.; Yang, Y.C. Walnut shell loaded with cobalt ferrite as efficient peroxymonosulfate activator to degrade ofloxacin. *Water Air Soil Pollut.* **2023**, *234*, 305.
7. Qin, H.; Cheng, H.; Li, H.; Wang, Y. Degradation of ofloxacin, amoxicillin and tetracycline antibiotics using magnetic core-shell  $\text{MnFe}_2\text{O}_4@\text{C-NH}_2$  as a heterogeneous fenton catalyst. *Chem. Eng. J.* **2020**, *396*, 125304.
